# Supplementary material for: In situ X-ray emission and high-resolution X-ray absorption spectroscopy applied to Ni-based bimetallic dry methane reforming catalysts
Source: Royal Society of Chemistry journal article supplement (doi:10.1039/d0nr01960g), 2020-01-01
Supplement: d0nr01960g1.pdf [file d0nr01960g1.pdf]

## Supporting Information

# In situ X-ray emission and high-resolution X-ray absorption spectroscopy applied to Ni-based Bimetallic Dry Methane Reforming Catalysts

Abbas Beheshti Askari<sup>(a)</sup>, Mustafa al Samarai<sup>(a)</sup>, Nozomu Hiraoka<sup>(b)</sup>, Hirofumi Ishii<sup>(b)</sup> Lukas Tillmann<sup>(c)</sup>, Martin Muhler<sup>\*(a, c)</sup> and Serena DeBeer<sup>\*(a)</sup>

(a) Max Planck Institute for Chemical Energy Conversion, Stiftstraße 34-36, D-45470 Mülheim an der Ruhr, Germany

(b) National Synchrotron Radiation Research Center, Hsinchu Science Park, Hsinchu 30076, Taiwan

(c) Laboratory of Industrial Chemistry, Ruhr-University Bochum, Universitätsstraße 150, D-44780 Bochum, Germany

Figure S1

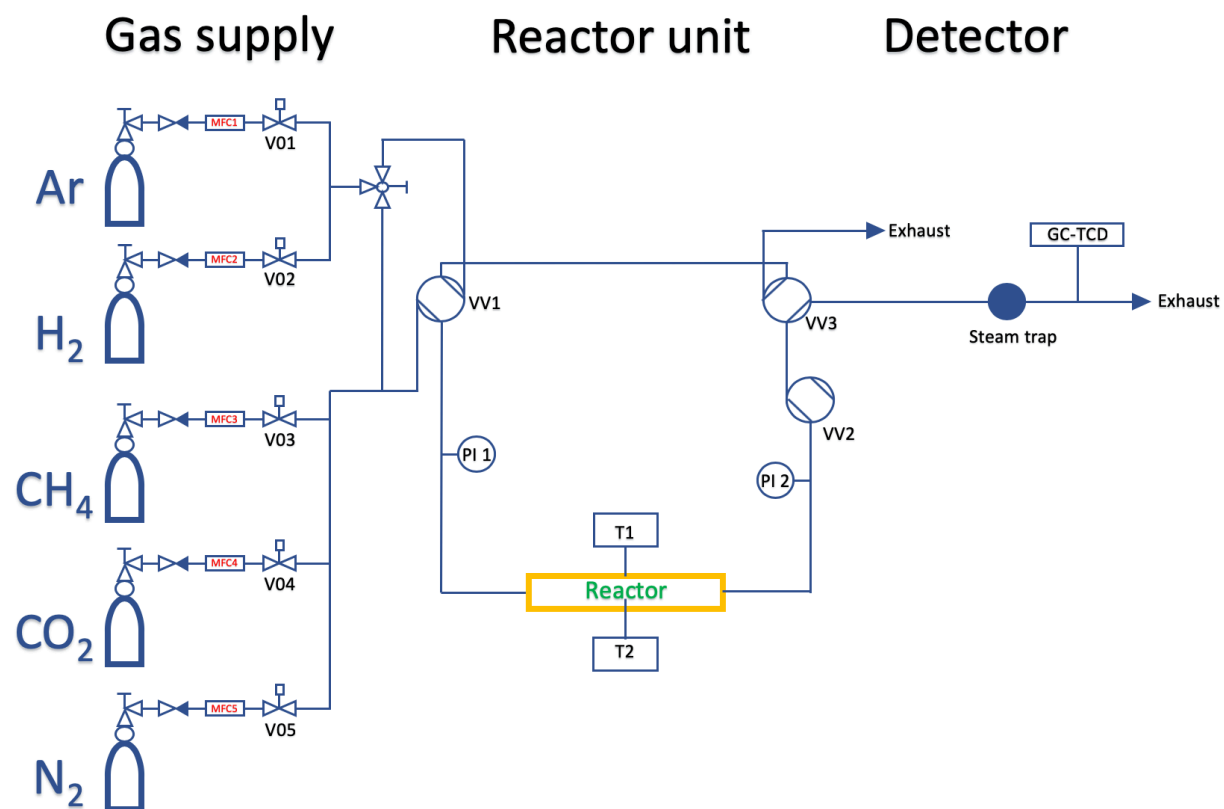

Figure S1: Flow scheme of the reactor used for the DMR activity measurements.

**Figure S2**

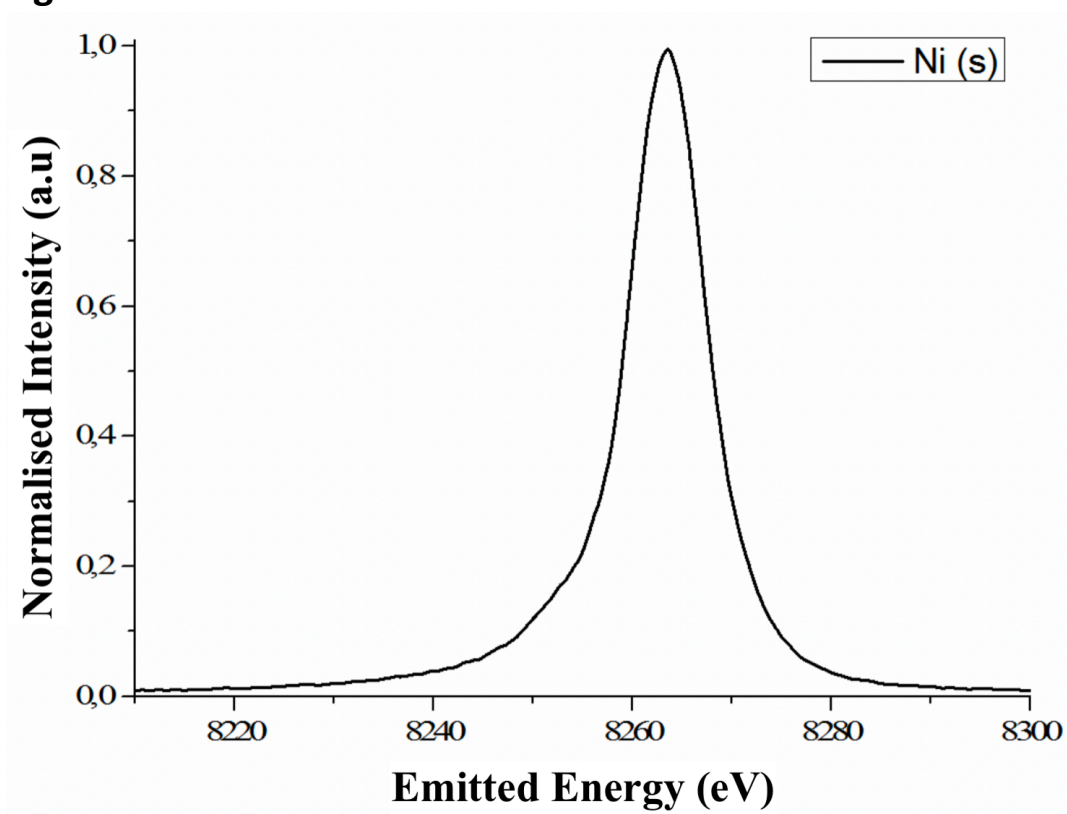

Figure S2: Reference Ni XES spectra of Ni foil.

**Figure S3**

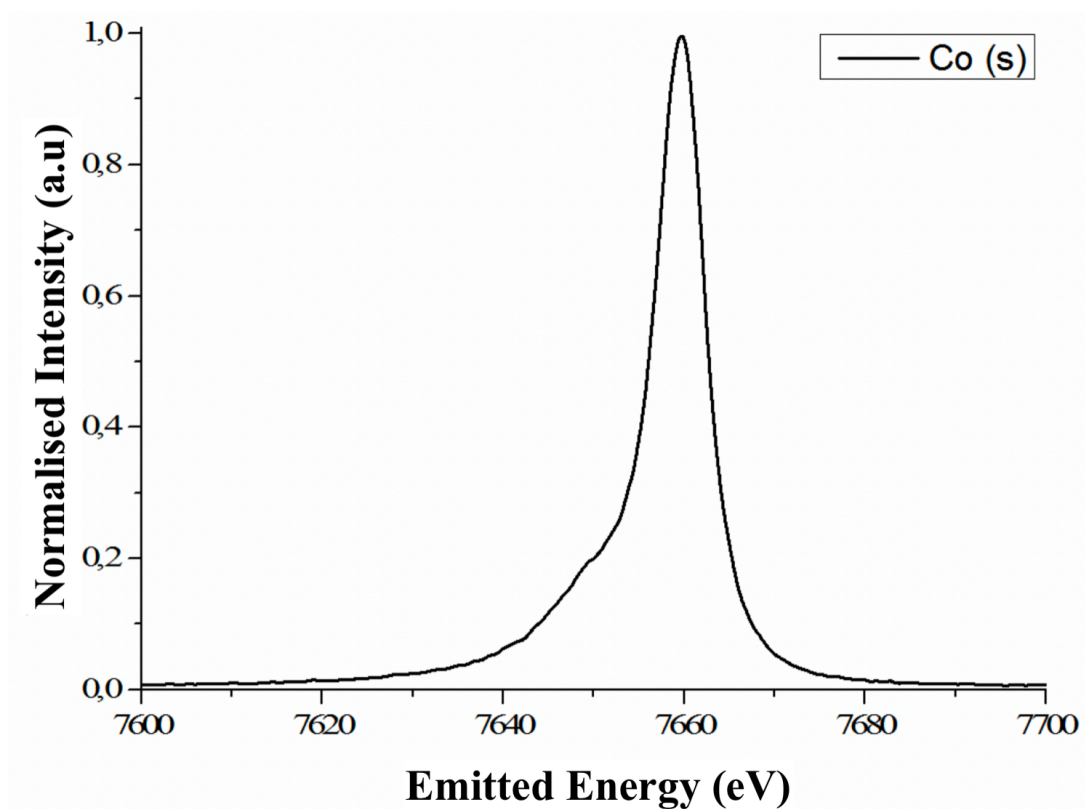

Figure S3: Reference Co XES spectra of Co foil.

## Figure S4

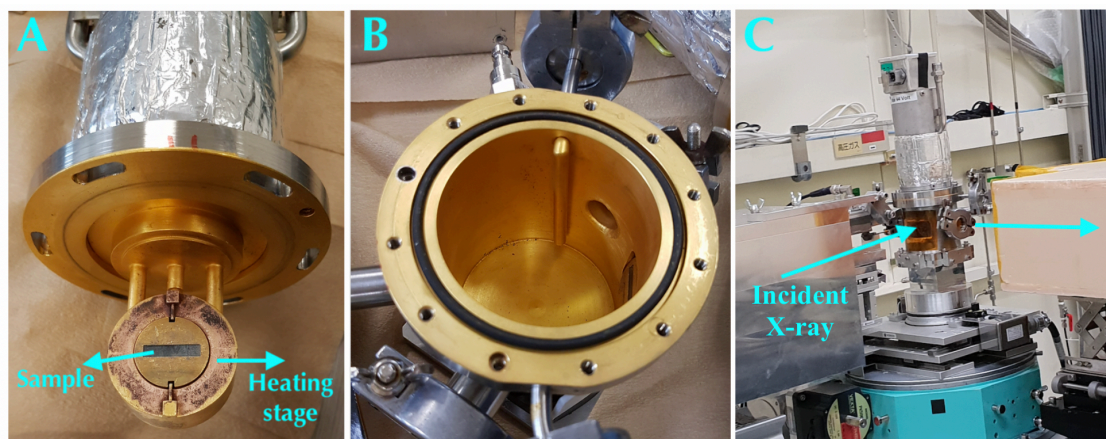

Figure S4: A) The sample powder is pressed into a pellet that is located in the sample holder. The heating stage allows heating up to 600°C. B) image showing that interior of the used reactor. C) Operational reactor setup used in this experiment. During this process the Incident X-ray beam enters the reactor from the window covered with Kapton tape and the scattered emission is measured from the 90° angle.

## Figure S5

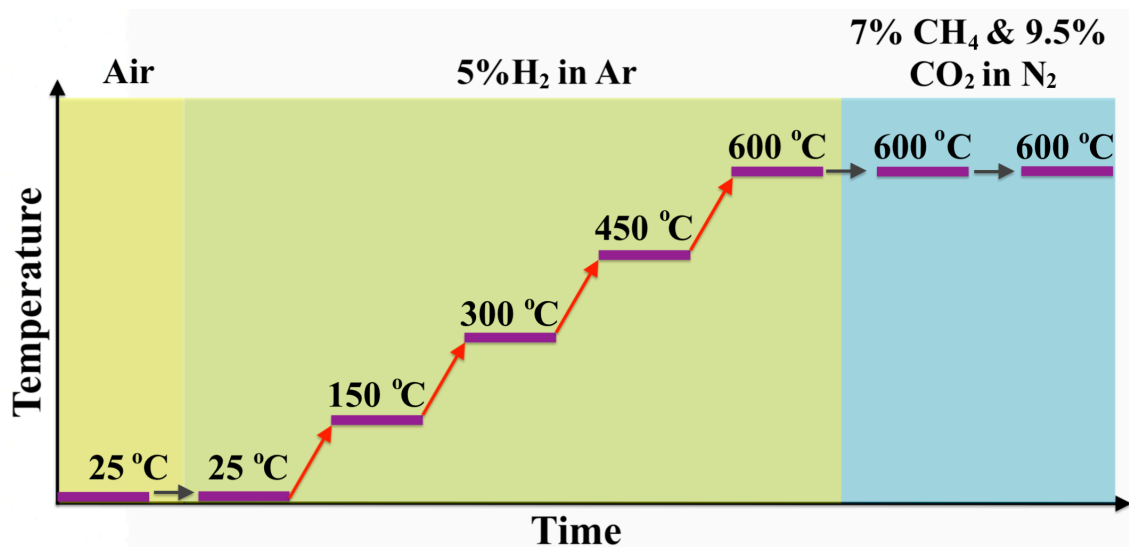

Figure S5: Schematic illustration of the hard X-ray experiments. In the first stage of the experiment the calcined samples were measured at 25 °C under air. The next step involves heating the sample under reducing conditions. In the last step the sample is exposed to DMR conditions.

**Table S1**

Table S1: Stabilized conversion/yield values for the NiCoO/ $\gamma$ -Al<sub>2</sub>O<sub>3</sub> and NiO/ $\gamma$ -Al<sub>2</sub>O<sub>3</sub> DMR catalysts.

|                                      | NiCoO/ $\gamma$ -Al <sub>2</sub> O <sub>3</sub> | NiO/ $\gamma$ -Al <sub>2</sub> O <sub>3</sub> |
|--------------------------------------|-------------------------------------------------|-----------------------------------------------|
| <i>CH<sub>4</sub> Conversion (%)</i> | 79                                              | 46                                            |
| <i>CO<sub>2</sub> Conversion (%)</i> | 71                                              | 43                                            |
| <i>H<sub>2</sub> Yield (%)</i>       | 70                                              | 39                                            |
| <i>CO Yield (%)</i>                  | 73                                              | 44                                            |
| <i>H<sub>2</sub>O Yield (%)</i>      | 9                                               | 5                                             |

**Figure S6**

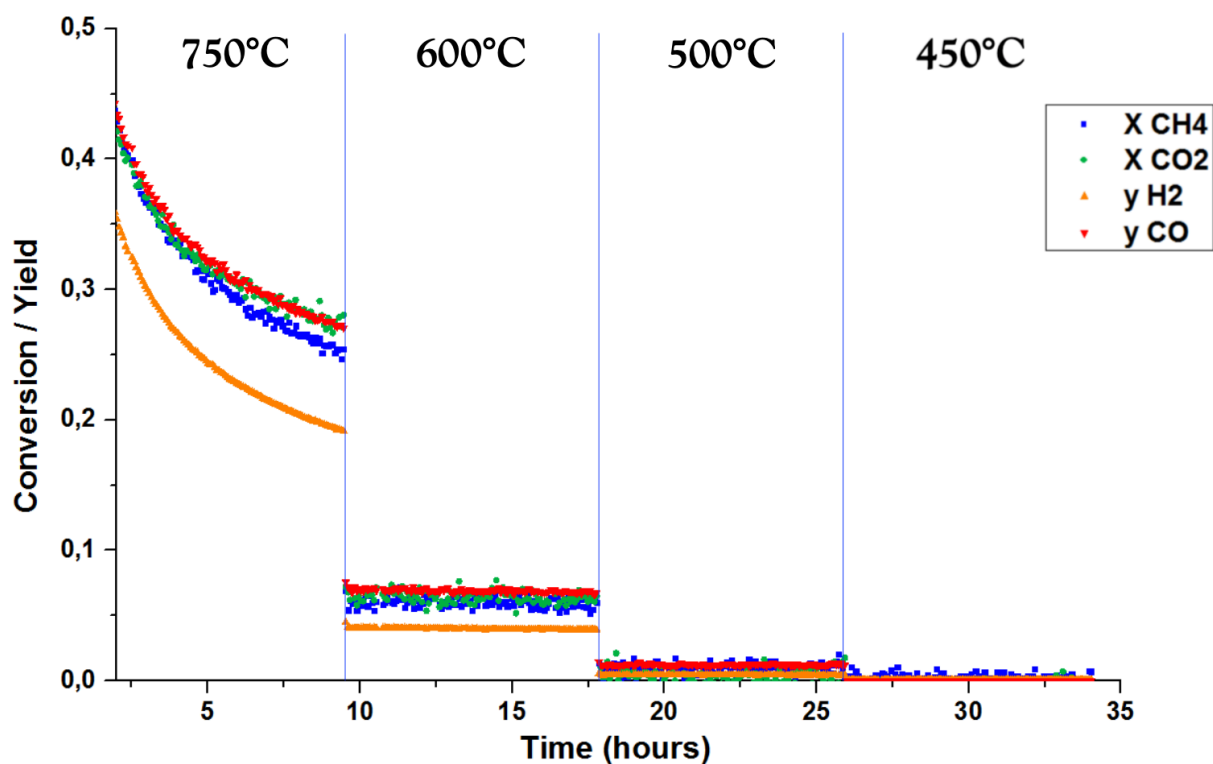

Figure S6: Conversion/Yield values of the NiCoO catalyst during the DMR experiment at 750 °C, 600 °C, 500 °C and 450 °C with 7% CH<sub>4</sub>, 9.5 % CO<sub>2</sub> in N<sub>2</sub> and a flow rate of 490 mL/min.

Figure S7

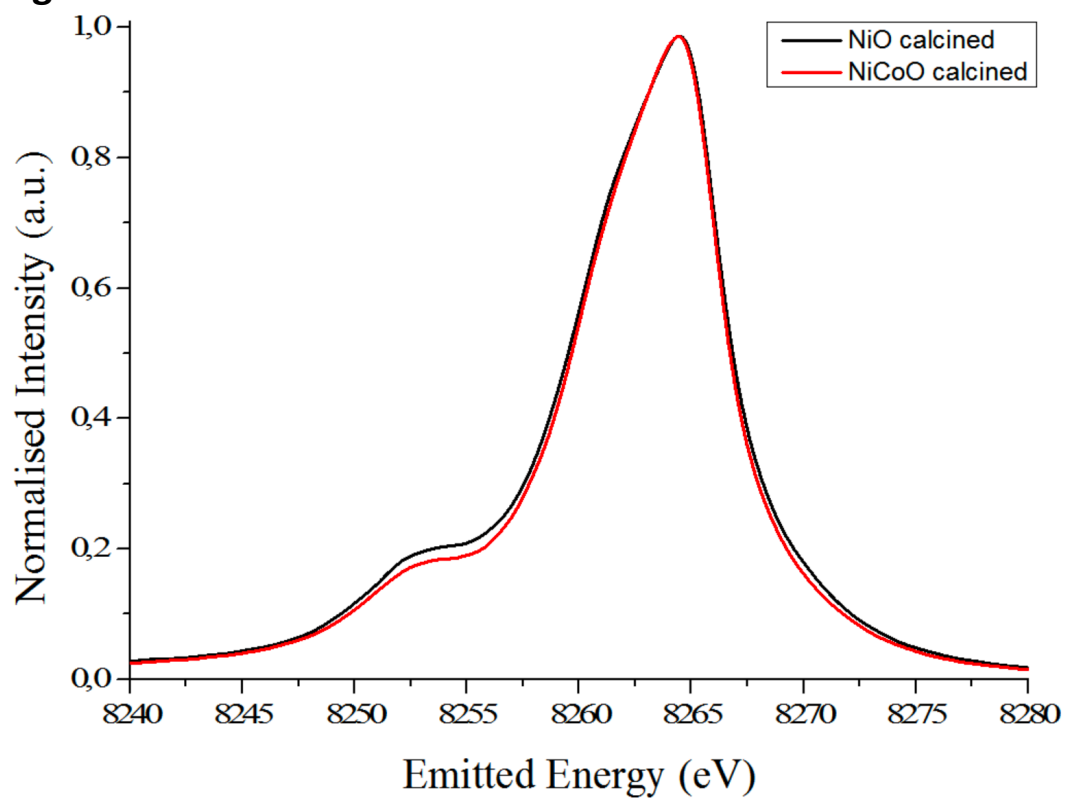

Figure S7: Overlay of the XES spectra for the NiO and NiCoO calcined catalysts.

Table S2

Table S2:  $K\beta_{1,3}$  peak position for both NiO/ $\gamma$ -Al<sub>2</sub>O<sub>3</sub> and NiCoO/ $\gamma$ -Al<sub>2</sub>O<sub>3</sub> catalysts measured under activation and DMR conditions.

|                          | NiO/ $\gamma$ -Al <sub>2</sub> O <sub>3</sub> | NiCoO/ $\gamma$ -Al <sub>2</sub> O <sub>3</sub> |
|--------------------------|-----------------------------------------------|-------------------------------------------------|
| <i>Calcined</i>          | 8264.50 eV                                    | 8264.44 eV                                      |
| <i>Reduced at 150 °C</i> | 8264.45 eV                                    | 8264.14 eV                                      |
| <i>Reduced at 300 °C</i> | 8263.72 eV                                    | 8263.32 eV                                      |
| <i>Reduced at 450 °C</i> | 8263.57 eV                                    | 8264.10 eV                                      |
| <i>Reduced 600 °C</i>    | 8263.48 eV                                    | 8263.99 eV                                      |
| <i>DMR 5 hours</i>       | 8263.40 eV                                    | 8263.68 eV                                      |

Figure S8

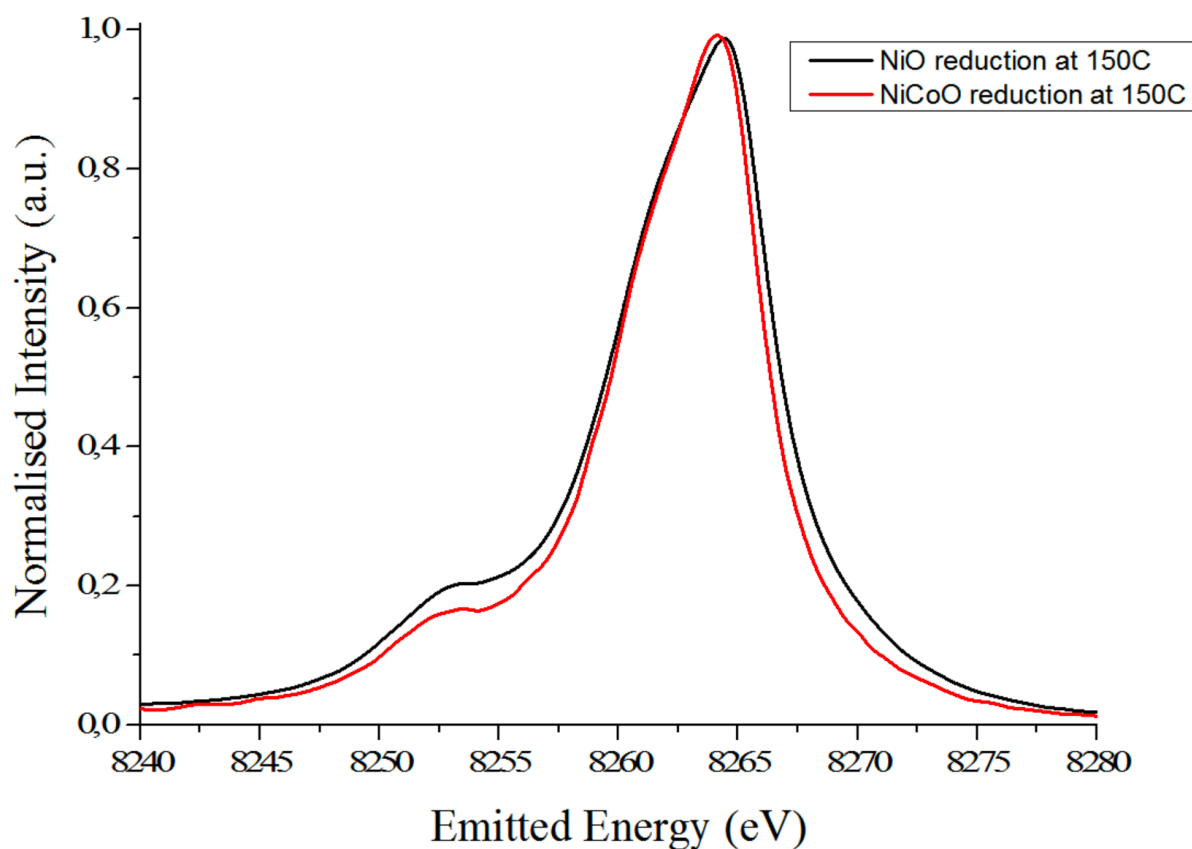

Figure S8: Overlay of the XES spectra for the NiO and NiCoO catalyst after being reduced at 150 °C.

Figure S9

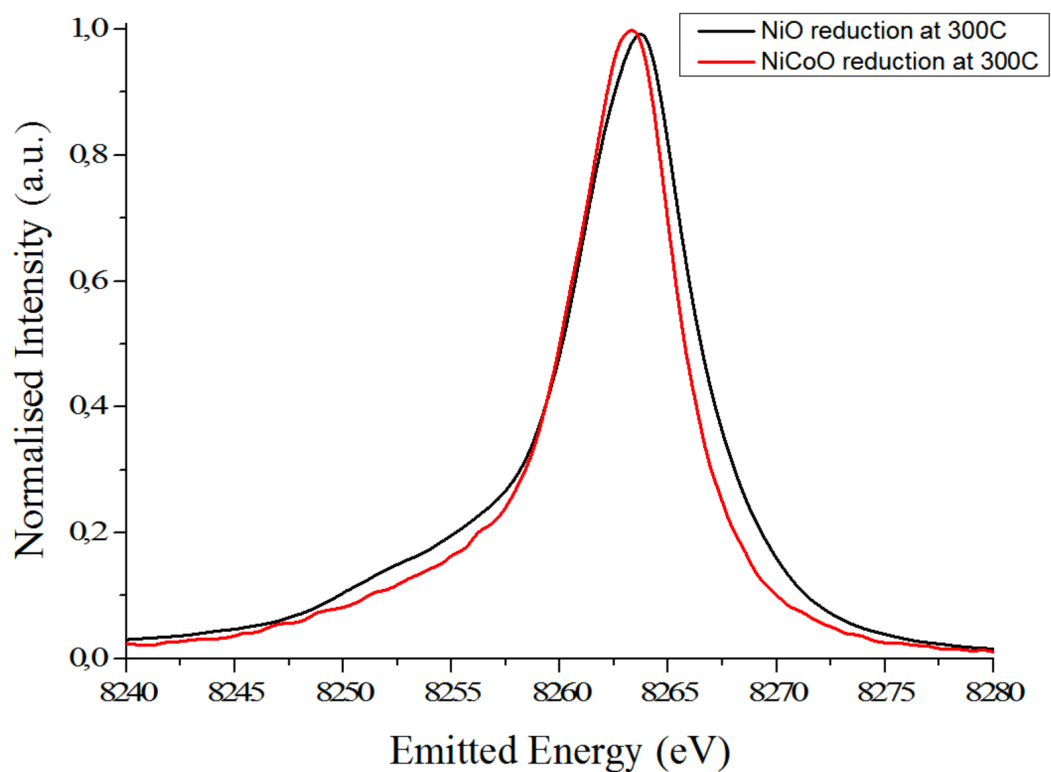

Figure S9: Overlay of the XES spectra for the NiO and NiCoO catalyst after being reduced at 300 °C.

**Figure S10**

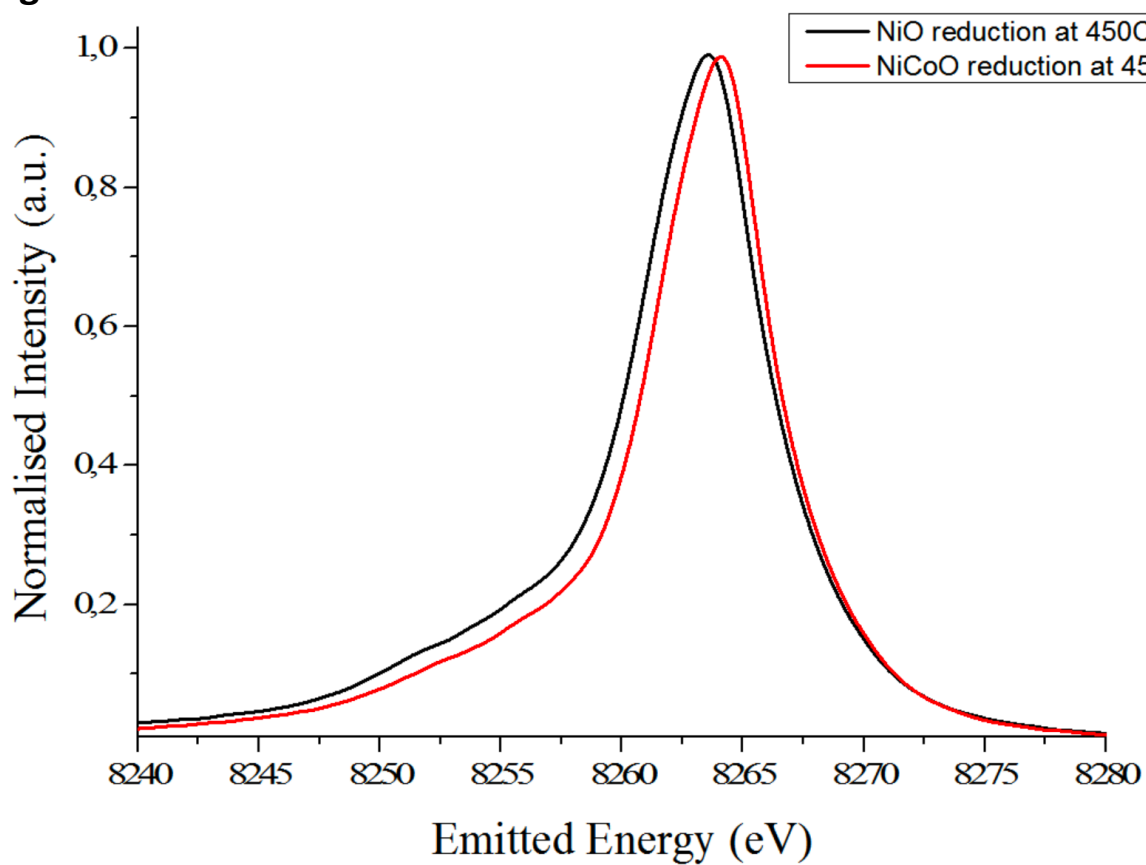

Figure S10: Overlay of the XES spectra for the NiO and NiCoO catalyst after being reduced at 450 °C.

**Figure S11**

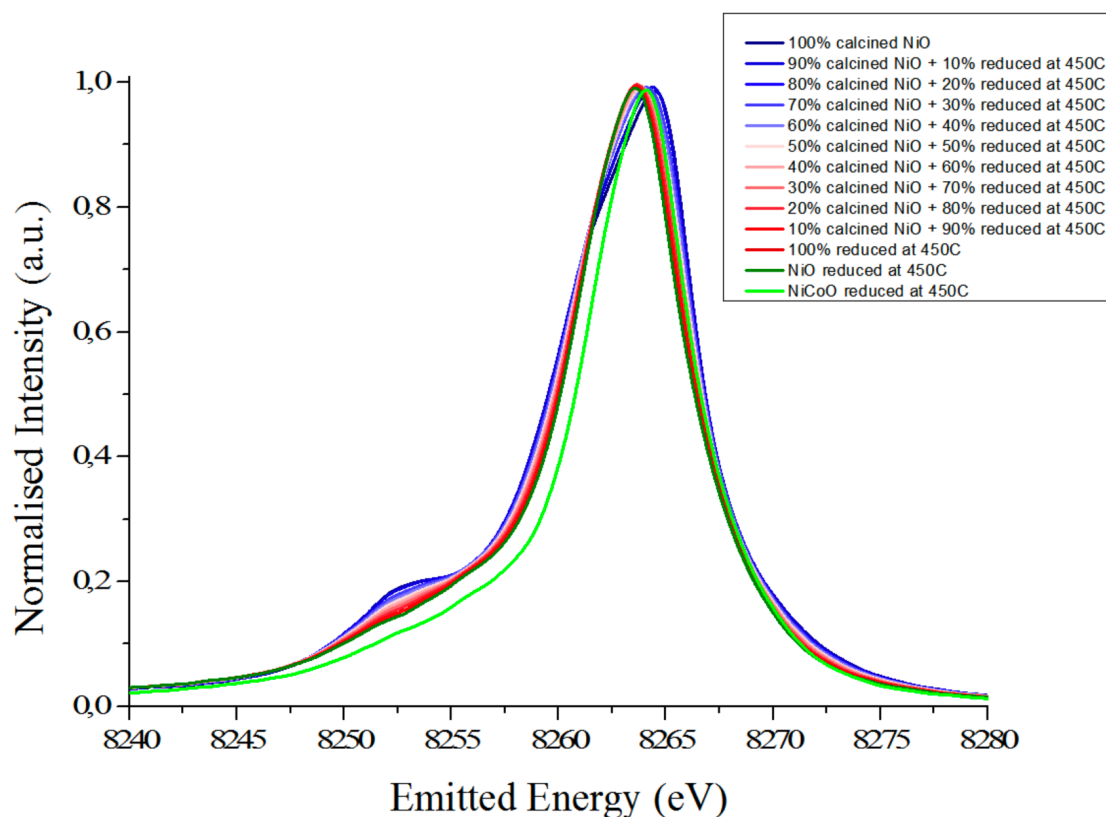

Figure S11: A combination of NiO XES spectra showing the calcined NiO (dark blue), the fully reduced NiO (dark green) and NiCoO (light green) at 450°C. Furthermore, several average spectra were obtained by mixing the spectra of the calcined and reduced NiO sample at 450 °C.

Figure S12

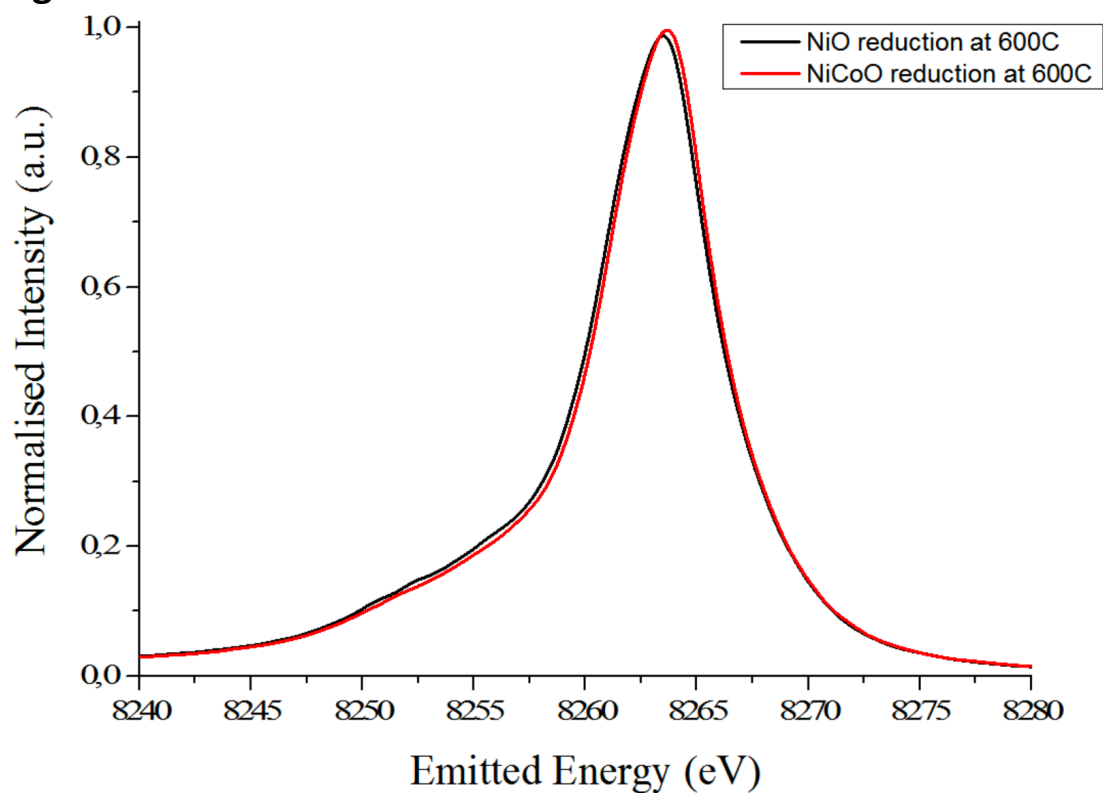

Figure S12: Overlay of the XES spectra for the NiO and NiCoO catalyst after being reduced at 600 °C.

Figure S13



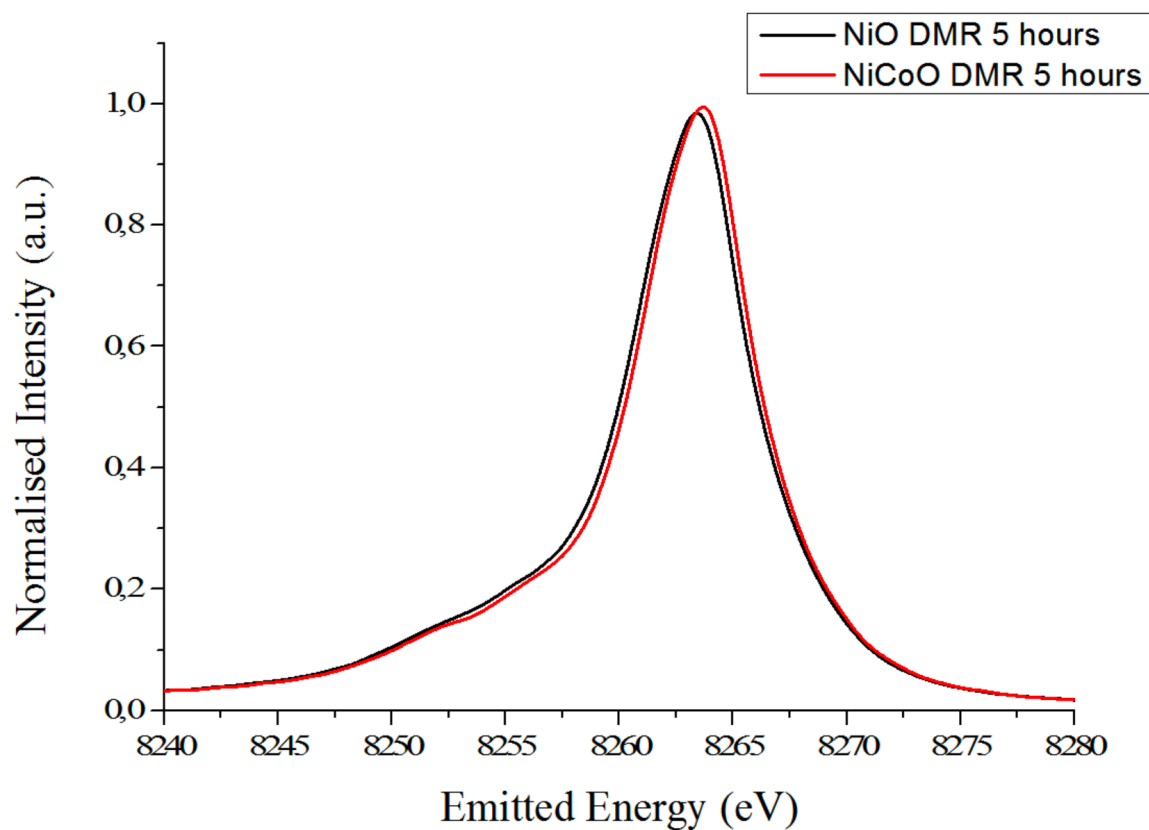

Figure S13: Overlay of the XES spectra for the NiO and NiCoO catalyst after being exposed to DMR conditions for 5 hours.

**Figure S14**

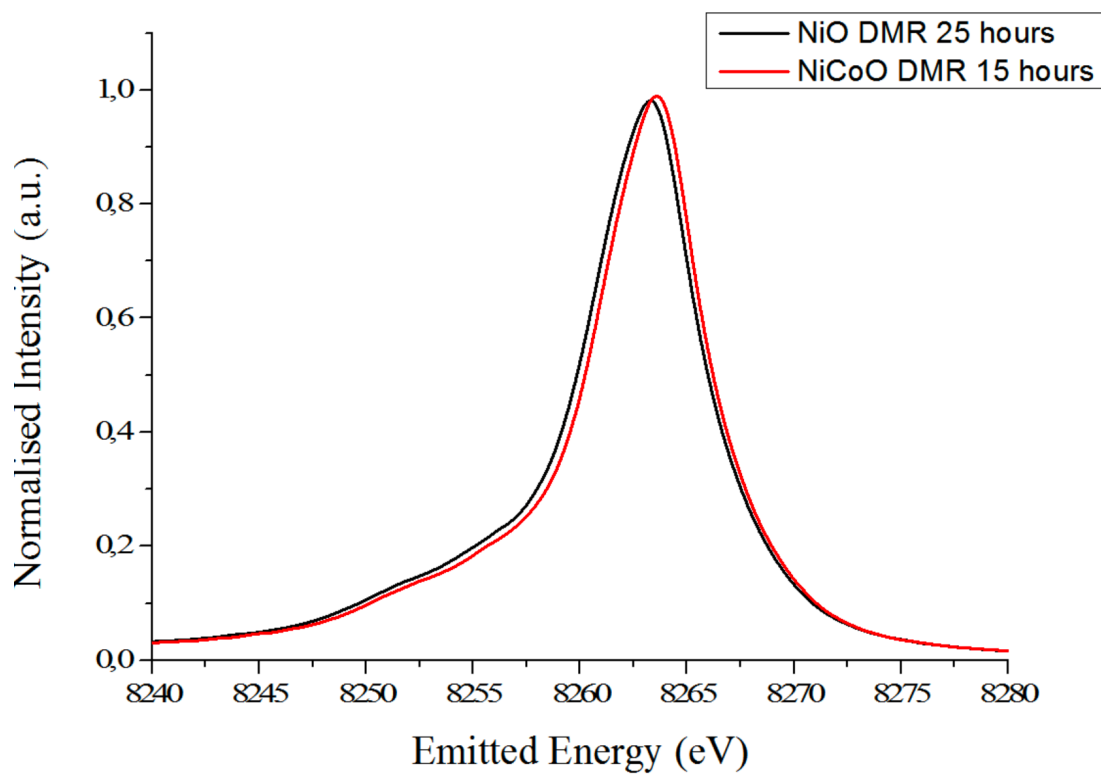

Figure S14: Overlay of the XES spectra for the NiO and NiCoO catalyst after being exposed to DMR conditions for 25 and 15 hours respectively.

**Figure S15**

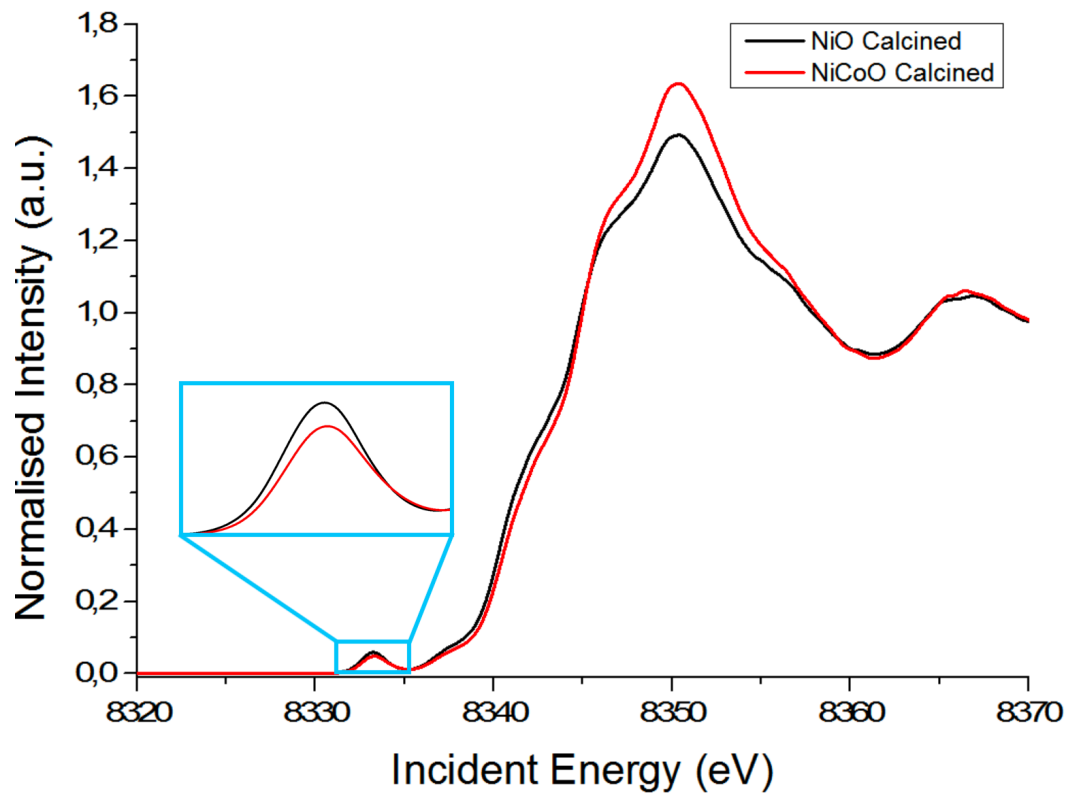

Figure S15: Overlay of the HERFD spectra for the NiO and NiCoO calcined catalysts.

**Figure S16**

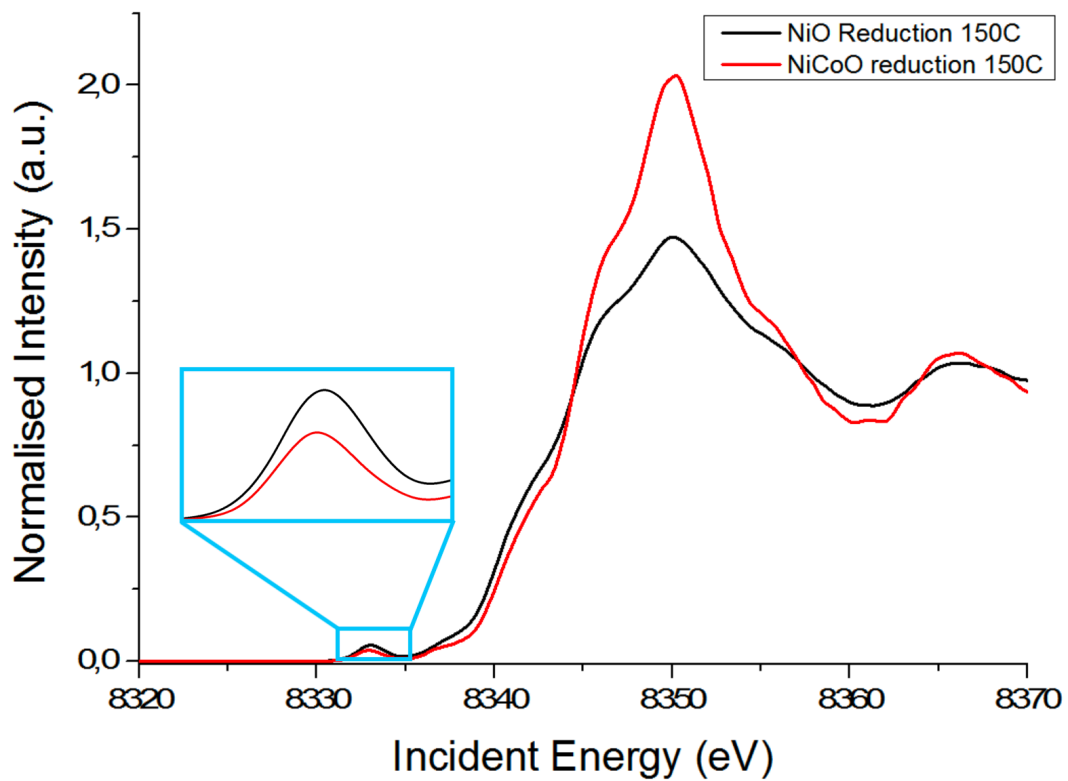

Figure S16: Overlay of the HERFD spectra for the NiO and NiCoO catalyst after being reduced at 150 °C.

**Figure S17**

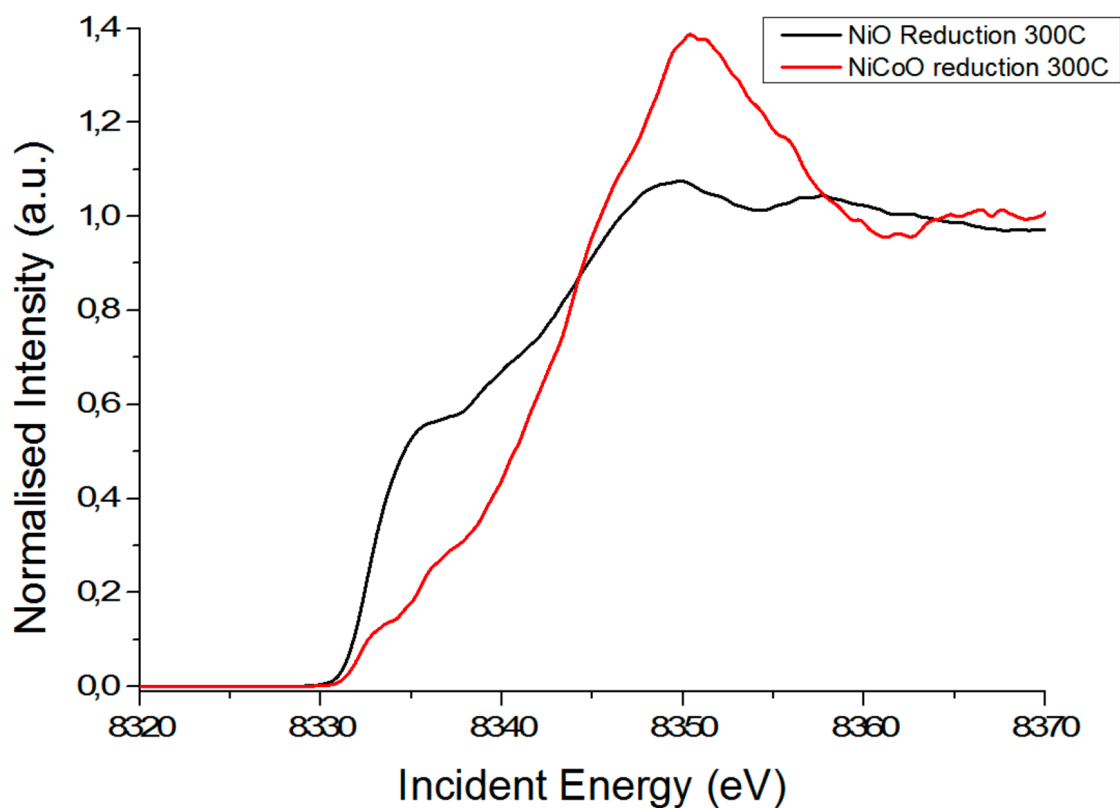

Figure S17: Overlay of the HERFD spectra for the NiO and NiCoO catalyst after being reduced at 300 °C.

**Figure S18**

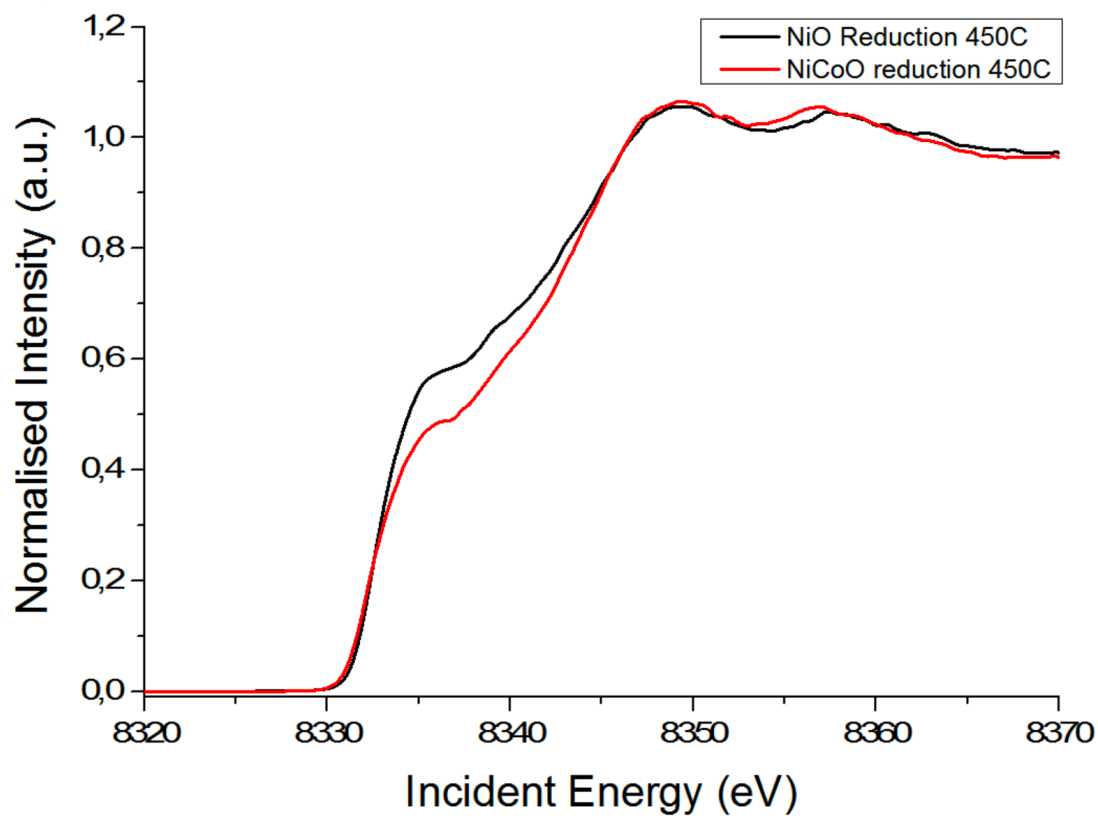

Figure S18: Overlay of the HERFD spectra for the NiO and NiCoO catalyst after being reduced at 450 °C.

**Figure S19**

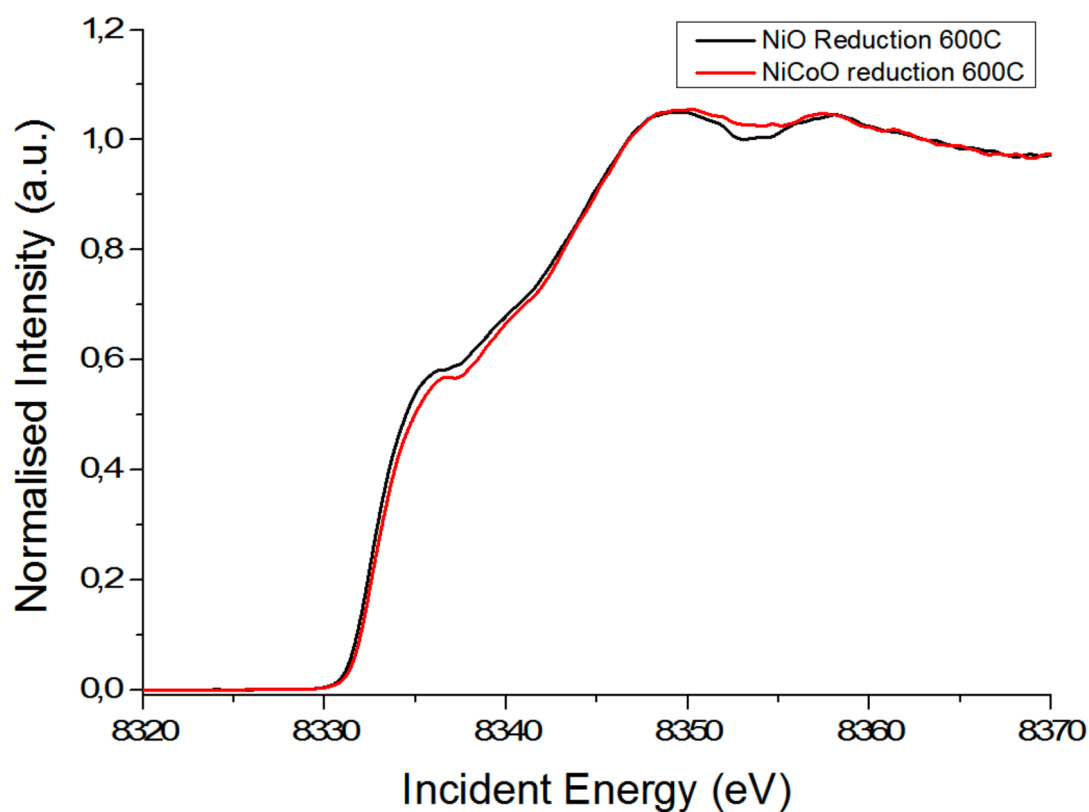

Figure S19: Overlay of the HERFD spectra for the NiO and NiCoO catalyst after being reduced at 600 °C.

Figure S20

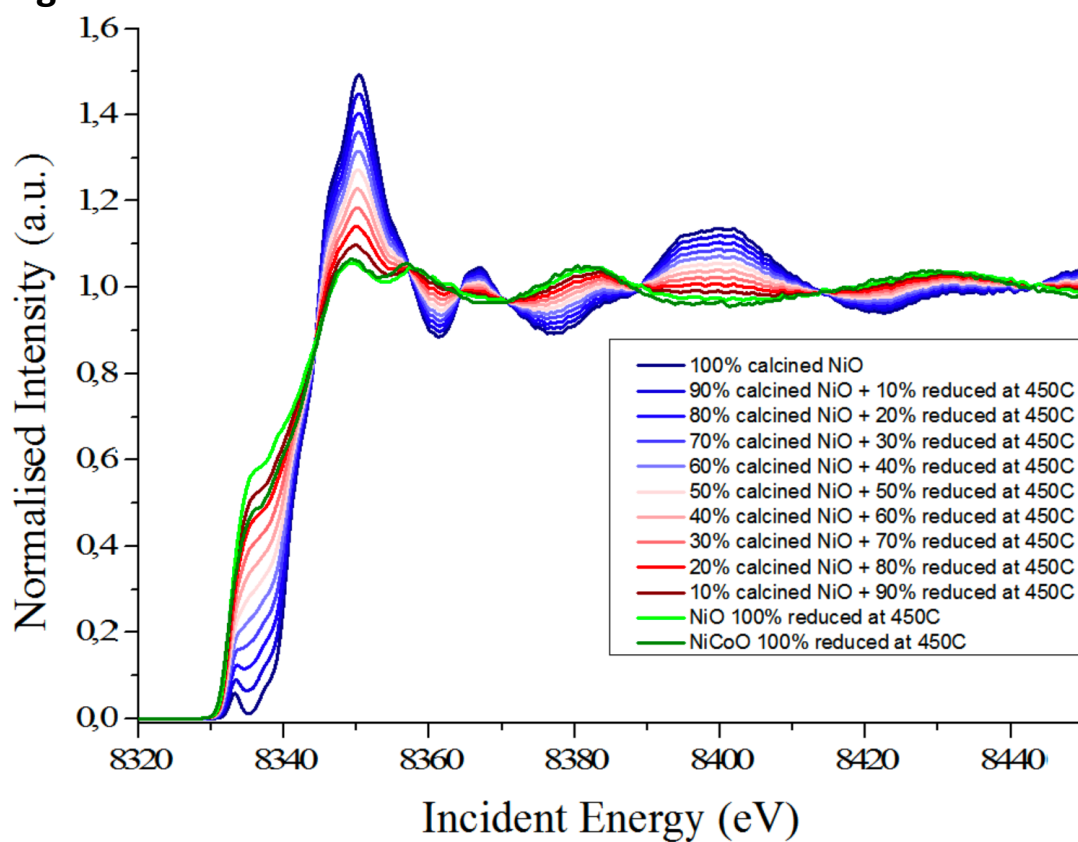

Figure S20: A combination of NiO HERFD spectra showing the calcined NiO (dark blue), the fully reduced NiO and NiCoO at 450 °C.

Figure S21

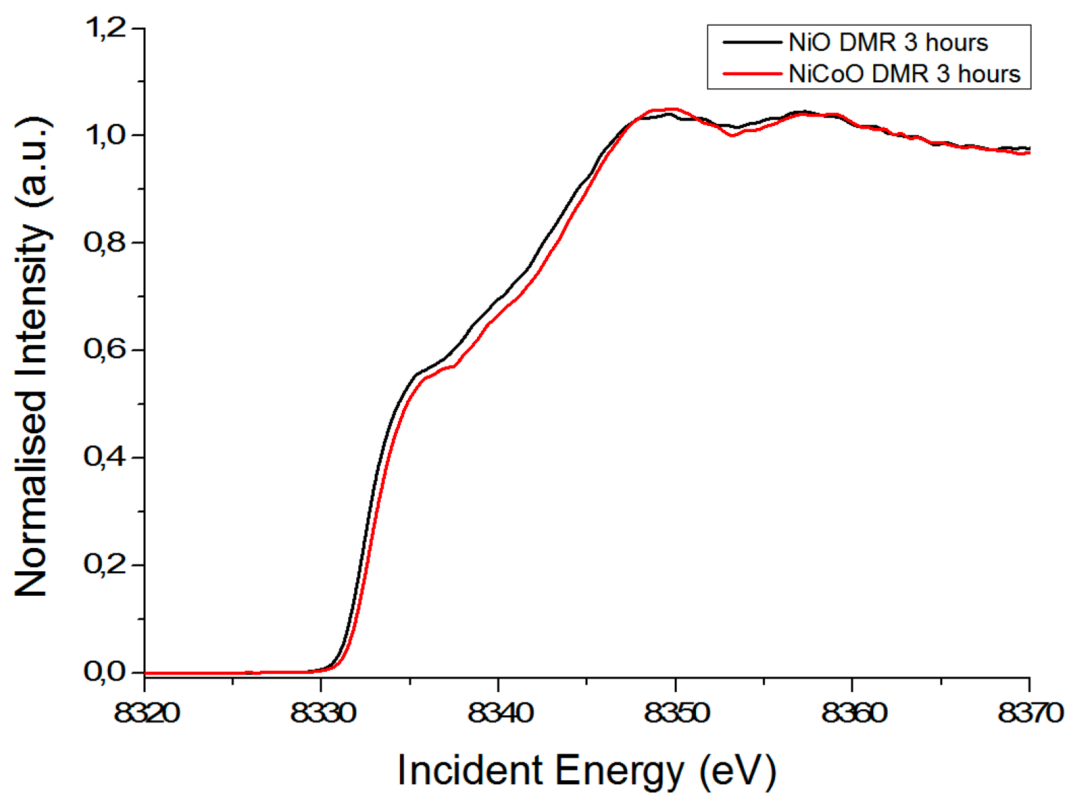

Figure S21: Overlay of the HERFD spectra for the NiO and NiCoO catalyst after being exposed to DMR conditions for 3 hours.

**Figure S22**

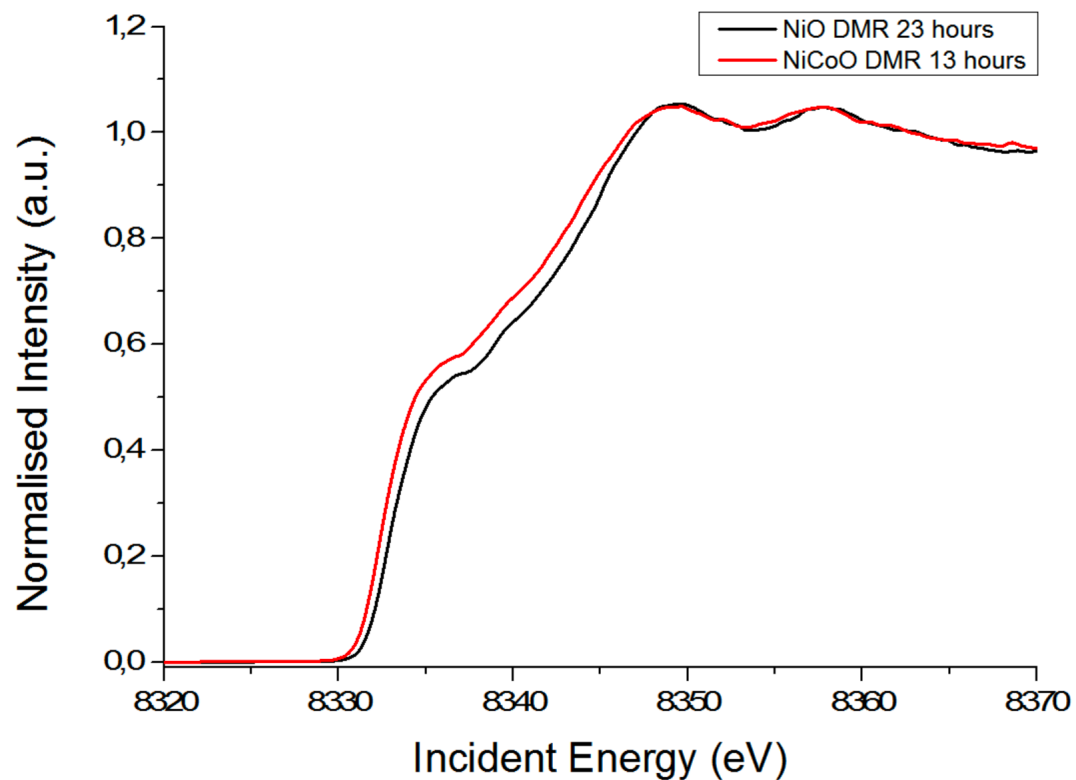

Figure S22: Overlay of the HERFD spectra for the NiO and NiCoO catalyst after being exposed to DMR conditions for 23 and 13 hours respectively.

**Figure S23**

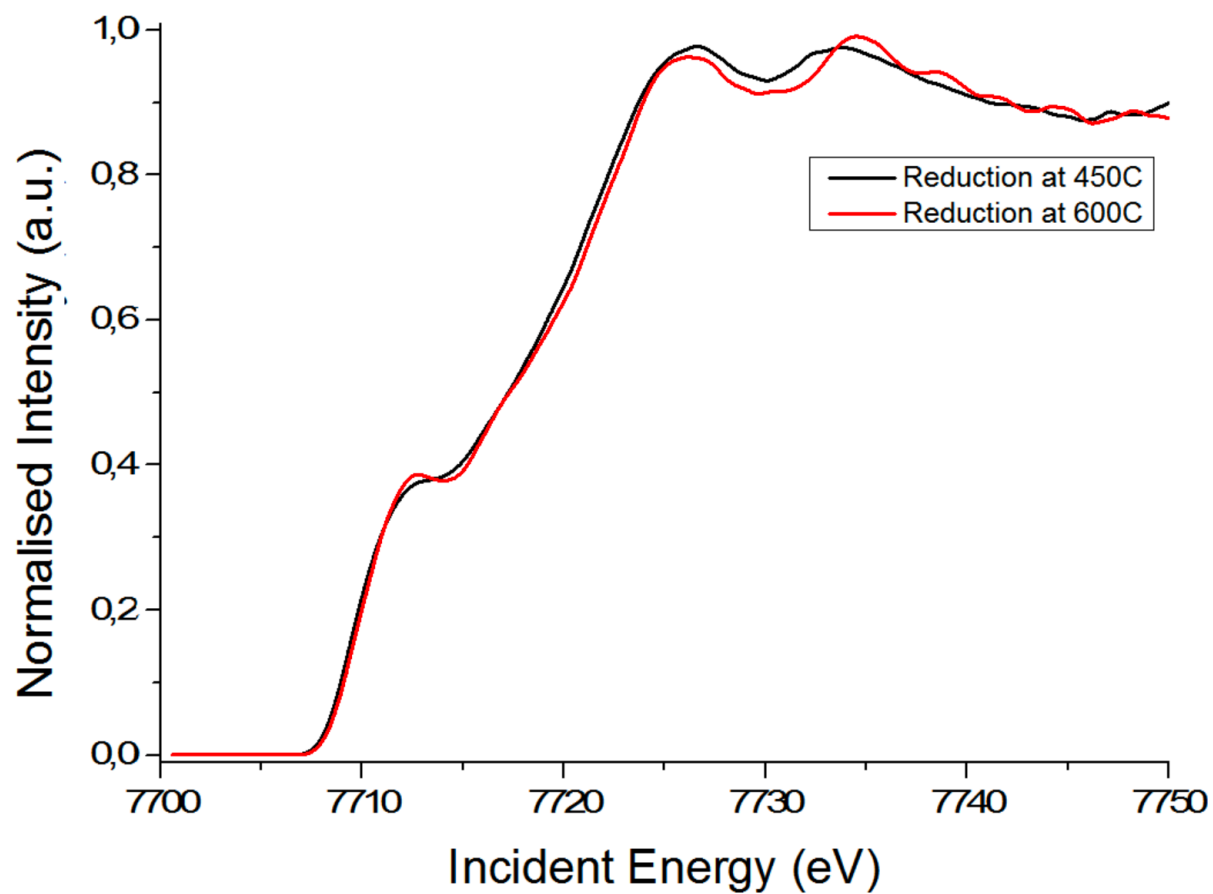

Figure S23: Overlay of the NiCoO HERFD spectra for the catalyst reduced at 450 and 600 °C.
